# Supplementary material for: Combination of sealed-tube decrepitation with continuous-flow isotope ratio mass spectrometry for carbon isotope analyses of CO2 from fluid inclusions in minerals
Source: Royal Society of Chemistry journal article supplement (doi:10.1039/c4ay00337c), 2014-01-01
Supplement: c4ay00337c1.pdf [file c4ay00337c1.pdf]

Electronic Supplementary Material (ESI) for Analytical Methods  
This journal is © The Royal Society of Chemistry 2014

**Supplementary Information for** “Combination of a sealed-tube decrepitation preparation and the isotope-ratio-monitoring gas chromatography method to perform carbon isotope analyses of CO<sub>2</sub> from fluid inclusions in minerals”

**Table S1** Measured  $\delta^{13}\text{C}$  values of the international references (IAEA-CH-6 and IAEA-CH-7) and gases from fluid inclusions in the quartz sample (zk104-90)

| Sample    | nmol CO <sub>2</sub> | Measured $\delta^{13}\text{C}^{\text{a}}$<br>(‰,VPDB) | Average $\delta^{13}\text{C}$<br>(‰,VPDB) | Known<br>(corrected)<br>$\delta^{13}\text{C}$ (‰,VPDB) | 1 $\sigma$ |
|-----------|----------------------|-------------------------------------------------------|-------------------------------------------|--------------------------------------------------------|------------|
| IAEA-CH-6 | 144                  | -10.06                                                |                                           |                                                        |            |
| IAEA-CH-6 | 156                  | -10.05                                                |                                           |                                                        |            |
| IAEA-CH-6 | 155                  | -10.03                                                |                                           |                                                        |            |
| IAEA-CH-6 | 137                  | -9.98                                                 |                                           |                                                        |            |
| IAEA-CH-6 | 149                  | -9.88                                                 |                                           |                                                        |            |
| IAEA-CH-6 | 155                  | -9.86                                                 |                                           |                                                        |            |
| IAEA-CH-6 | 126                  | -9.84                                                 | -9.96                                     | -10.45                                                 | 0.09       |
| IAEA-CH-7 | 287                  | -31.90                                                |                                           |                                                        |            |
| IAEA-CH-7 | 260                  | -31.80                                                |                                           |                                                        |            |
| IAEA-CH-7 | 233                  | -31.79                                                |                                           |                                                        |            |
| IAEA-CH-7 | 265                  | -31.79                                                |                                           |                                                        |            |
| IAEA-CH-7 | 260                  | -31.73                                                |                                           |                                                        |            |
| IAEA-CH-7 | 239                  | -31.72                                                |                                           |                                                        |            |
| IAEA-CH-7 | 238                  | -31.67                                                | -31.77                                    | -32.15                                                 | 0.07       |
| zk104-90  | 113                  | -12.23                                                |                                           |                                                        |            |
| zk104-90  | 108                  | -11.99                                                |                                           |                                                        |            |
| zk104-90  | 108                  | -11.87                                                |                                           |                                                        |            |
| zk104-90  | 113                  | -11.50                                                |                                           |                                                        |            |
| zk104-90  | 191                  | -11.31                                                |                                           |                                                        |            |
| zk104-90  | 114                  | -11.22                                                |                                           |                                                        |            |
| zk104-90  | 112                  | -10.55                                                | -11.52                                    | -12.01                                                 | 0.56       |

a.  $\delta^{13}\text{C}$  are reported with respect to the laboratory working reference CO<sub>2</sub> at IGGCAS ( $\delta^{13}\text{C}=-31.72\text{‰}$ , VPDB)
